# Supplementary material
Source: PubMed Central journal article supplement (PMC5548464)
Supplement: NIHMS884676-supplement-supplement_1.pdf [file NIHMS884676-supplement-supplement_1.pdf]

**Supplementary Table I (online only).** Baseline clinical features considered in the propensity analysis

- Cardiac risk score of major adverse event<sup>a,b</sup>
- Smoking history
- Hypertension
- Diabetes mellitus
- Prior lower extremity bypass
- Prior major amputation
- Prior vascular surgery
- Medications: aspirin, statin
- Geographic region
- Year of surgery

<sup>a</sup>These procedure-specific models were weighted upon indication, age, race, smoking status, diabetes mellitus, congestive heart failure (CHF), dialysis history, stress test status, history of amputation, clopidogrel use, need for transfusion, return to operating room.

<sup>b</sup>Includes any or all of postoperative myocardial infarction (POMI), dysrhythmia, CHF.

**Supplementary Table II (online only).** Infringuinal bypass

| <i>Risk strata</i> | <i>No β-B, No. (%)</i> | <i>Pre-op β-B, No. (%)</i> | <i>OR (95% CI)</i> | <i>P value<sup>a</sup></i> |
|--------------------|------------------------|----------------------------|--------------------|----------------------------|
| Low risk           | 1360                   | 368                        |                    |                            |
| POMI               | 4 (0.3)                | 3 (0.8)                    | 2.8 (0.55-12.7)    | .18                        |
| Dysrhythmia        | 17 (1.2)               | 12 (3.3)                   | 2.7 (1.23-5.58)    | .01                        |
| CHF                | 2 (0.1)                | 2 (0.5)                    | 3.7 (0.44-31.0)    | .19                        |
| Any MACE           | 21 (1.5)               | 14 (3.8)                   | 2.5 (1.24-4.97)    | .008                       |
| 30-day death       | 3 (0.2)                | 0 (0)                      | Not estimable      | 1                          |
| Medium risk        | 936                    | 377                        |                    |                            |
| POMI               | 15 (1.6)               | 4 (1.1)                    | 0.66 (0.19-1.83)   | .46                        |
| Dysrhythmia        | 27 (2.9)               | 13 (3.4)                   | 1.2 (0.60-2.31)    | .59                        |
| CHF                | 5 (0.5)                | 1 (0.3)                    | 0.50 (0.03-3.08)   | .52                        |
| Any MACE           | 42 (4.5)               | 16 (4.2)                   | 0.94 (0.51-1.67)   | .85                        |
| 30-day death       | 6 (0.6)                | 4 (1.1)                    | 1.7 (0.42-5.85)    | .43                        |
| High risk          | 664                    | 321                        |                    |                            |
| POMI               | 28 (4.2)               | 26 (8.1)                   | 2.0 (1.15-3.48)    | .01                        |
| Dysrhythmia        | 49 (7.4)               | 20 (6.2)                   | 0.83 (0.48-1.41)   | .51                        |
| CHF                | 33 (5.0)               | 14 (4.4)                   | 0.87 (0.47-1.62)   | .68                        |
| Any MACE           | 84 (12.7)              | 45 (14.0)                  | 1.1 (0.76-1.65)    | .55                        |
| 30-day death       | 17 (2.6)               | 18 (5.6)                   | 2.3 (1.14-4.48)    | .02                        |

*β-B*, β-blocker; *CHF*, congestive heart failure; *CI*, confidence interval; *MACE*, major adverse cardiac event; *OR*, odds ratio; *POMI*, postoperative myocardial infarction.

<sup>a</sup>The *P* value is the result of the  $\chi^2$  or Fisher exact test.

**Supplementary Table III (online only).** Aortofemoral bypass (AFB)

| <i>Risk strata</i> | <i>No β-B, No. (%)</i> | <i>Pre-op β-B, No. (%)</i> | <i>OR (95% CI)</i> | <i>P value<sup>a</sup></i> |
|--------------------|------------------------|----------------------------|--------------------|----------------------------|
| Low risk           | 249                    | 76                         |                    |                            |
| POMI               | 1 (0.4)                | 0 (0)                      | Not estimable      | 1                          |
| Dysrhythmia        | 9 (3.6)                | 3 (3.9)                    | 1.1 (0.24-3.78)    | .89                        |
| CHF                | 3 (1.2)                | 1 (1.3)                    | 1.1 (0.05-8.68)    | .94                        |
| Any MACE           | 11 (4.4)               | 4 (5.3)                    | 1.2 (0.33-3.64)    | .76                        |
| 30-day death       | 1 (0.4)                | 0 (0)                      | Not estimable      | 1                          |
| Medium risk        | 211                    | 66                         |                    |                            |
| POMI               | 3 (1.4)                | 4 (5.7)                    | 4.2 (0.91-21.8)    | .07                        |
| Dysrhythmia        | 13 (6.2)               | 5 (7.1)                    | 1.2 (0.36-3.24)    | .77                        |
| CHF                | 2 (0.9)                | 3 (4.3)                    | 4.67 (0.76-36.1)   | .09                        |
| Any MACE           | 17 (8.1)               | 10 (14.3)                  | 1.9 (0.80-4.31)    | .13                        |
| 30-day death       | 1 (0.5)                | 0 (0)                      | Not estimable      | 1                          |
| High risk          | 150                    | 64                         |                    |                            |
| POMI               | 8 (5.3)                | 6 (9.4)                    | 1.8 (0.58-5.51)    | .28                        |
| Dysrhythmia        | 16 (10.7)              | 13 (20.3)                  | 2.1 (0.95-4.75)    | .06                        |
| CHF                | 15 (10.0)              | 5 (7.8)                    | 0.76 (0.24-2.07)   | .62                        |
| Any MACE           | 30 (20.0)              | 19 (29.7)                  | 1.7 (0.86-3.28)    | .13                        |
| 30-day death       | 8 (5.3)                | 1 (1.6)                    | 0.28 (0.02-1.58)   | .24                        |

*β-B*, β-blocker; *CHF*, congestive heart failure; *CI*, confidence interval; *MACE*, major adverse cardiac event; *OR*, odds ratio; *POMI*, postoperative myocardial infarction.

<sup>a</sup>The *P* value is the result of the  $\chi^2$  or Fisher exact test.

**Supplementary Table IV (online only).** Open abdominal aortic aneurysm (OAAA) repair

| <i>Risk strata</i> | <i>No β-B, No. (%)</i> | <i>Pre-op β-B, No. (%)</i> | <i>OR (95% CI)</i> | <i>P value<sup>a</sup></i> |
|--------------------|------------------------|----------------------------|--------------------|----------------------------|
| Low risk           | 271                    | 184                        |                    |                            |
| POMI               | 2 (0.7)                | 0 (0)                      | Not estimable      | .52                        |
| Dysrhythmia        | 11 (4.1)               | 8 (4.3)                    | 1.1 (0.41-2.71)    | .88                        |
| CHF                | 4 (1.5)                | 0 (0)                      | Not estimable      | .15                        |
| Any MACE           | 16 (5.9)               | 8 (4.3)                    | 0.72 (0.29-1.68)   | .47                        |
| 30-day death       | 0 (0)                  | 0 (0)                      | Not estimable      | 1                          |
| Medium risk        | 222                    | 156                        |                    |                            |
| POMI               | 6 (2.7)                | 1 (0.6)                    | 0.23 (0.01-1.38)   | .18                        |
| Dysrhythmia        | 19 (8.6)               | 15 (9.6)                   | 1.1 (0.55-2.30)    | .72                        |
| CHF                | 5 (2.3)                | 4 (2.6)                    | 1.1 (0.28-4.38)    | .85                        |
| Any MACE           | 23 (10.4)              | 18 (11.5)                  | 1.1 (0.58-2.16)    | .72                        |
| 30-day death       | 3 (1.4)                | 2 (1.3)                    | 0.95 (0.12-5.79)   | .95                        |
| High risk          | 223                    | 137                        |                    |                            |
| POMI               | 22 (9.9)               | 5 (3.6)                    | 0.35 (0.11-0.87)   | .04                        |
| Dysrhythmia        | 41 (18.4)              | 25 (18.2)                  | 0.99 (0.57-1.71)   | .97                        |
| CHF                | 7 (3.1)                | 7 (5.1)                    | 1.7 (0.56-4.96)    | .35                        |
| Any MACE           | 56 (25.1)              | 30 (21.9)                  | 0.84 (0.50-1.38)   | .49                        |
| 30-day death       | 11 (4.9)               | 6 (4.4)                    | 0.88 (0.29-2.38)   | .81                        |

*β-B*, β-blocker; *CHF*, congestive heart failure; *CI*, confidence interval; *MACE*, major adverse cardiac event; *OR*, odds ratio; *POMI*, postoperative myocardial infarction.

<sup>a</sup>The *P* value is the result of the  $\chi^2$  or Fisher exact test.
